# Supplementary material for: A superhydrophobic 3D porous material for oil spill cleanup
Source: Royal Society of Chemistry journal article supplement (doi:10.1039/c4ra06337f), 2014-01-01
Supplement: c4ra06337f1.pdf [file c4ra06337f1.pdf]

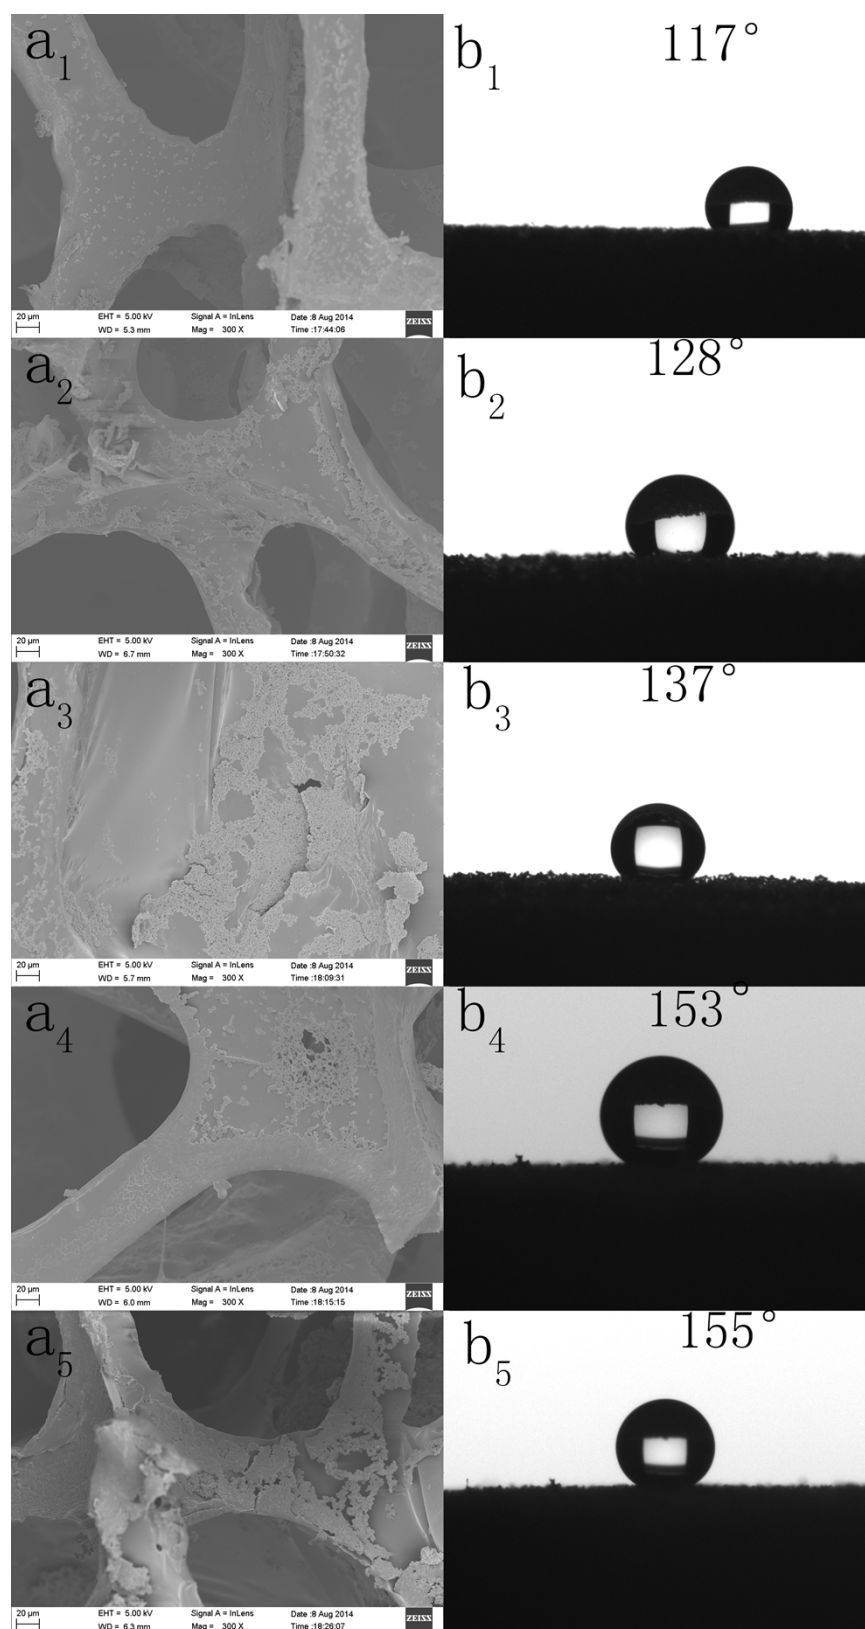

**S 1:** a) SEM images of PU sponges when fabricated in PP concentration of 0.25%, 0.5%, 0.75%, 1.0%, 1.25%; b) Water contact-angle images of sponge when fabricated in PP concentration of 0.25%, 0.5%, 0.75%, 1.0%, 1.25%.

**S 2:** Separation of water and organic solvent (n-hexane as an example) by pump.

**S 3:** Oil collections with six sponges by pump.

***S*** 4: Separation of oil-water in simulated winds and waves.

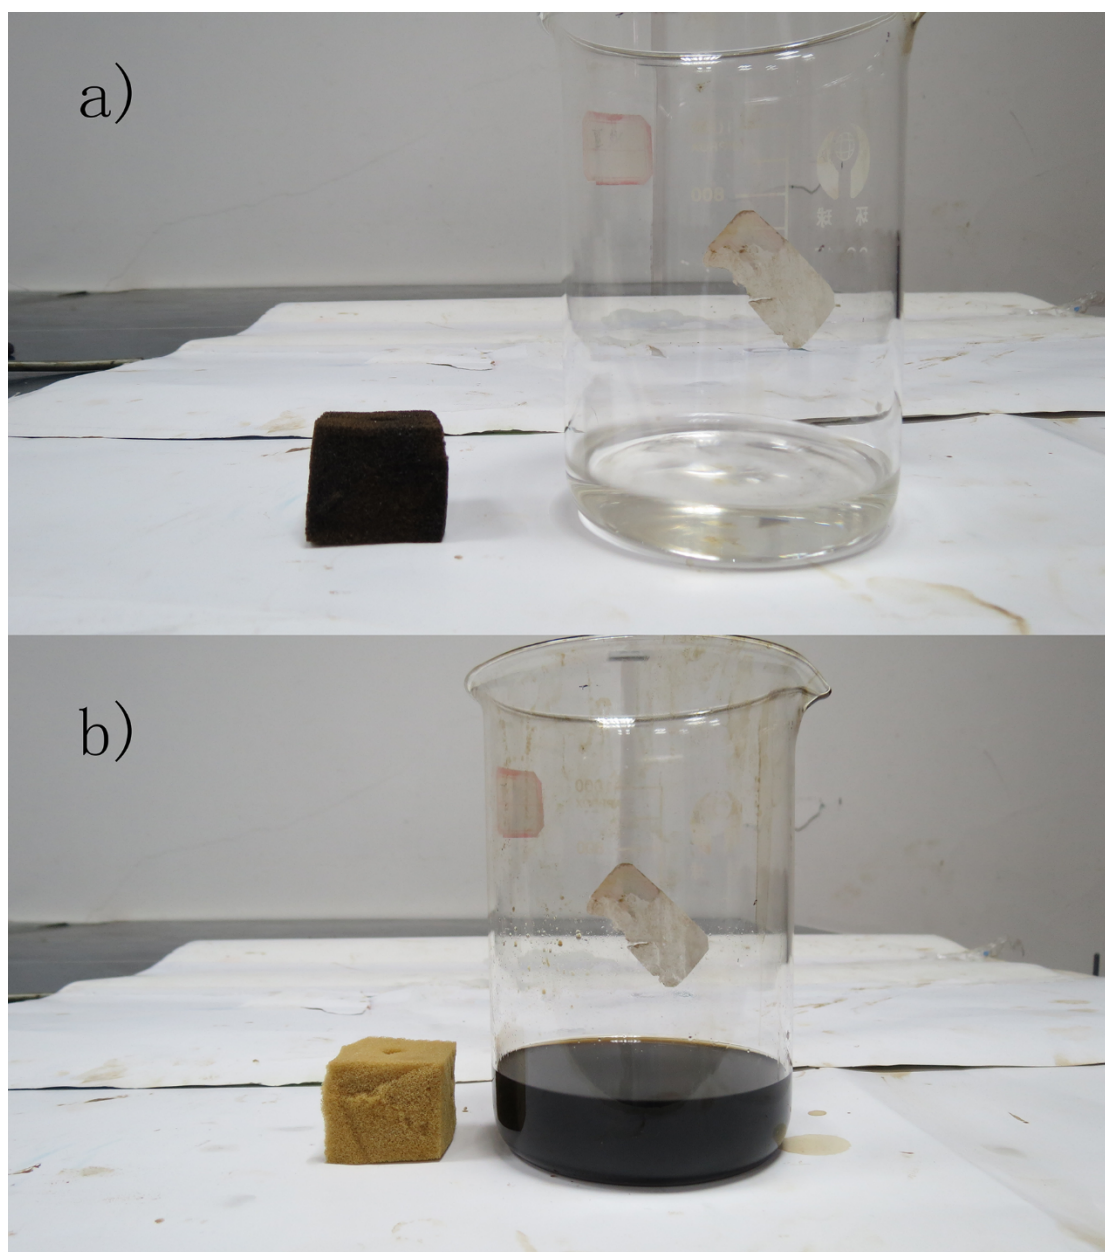

**S 5:** Wash of the modified sponge after use.

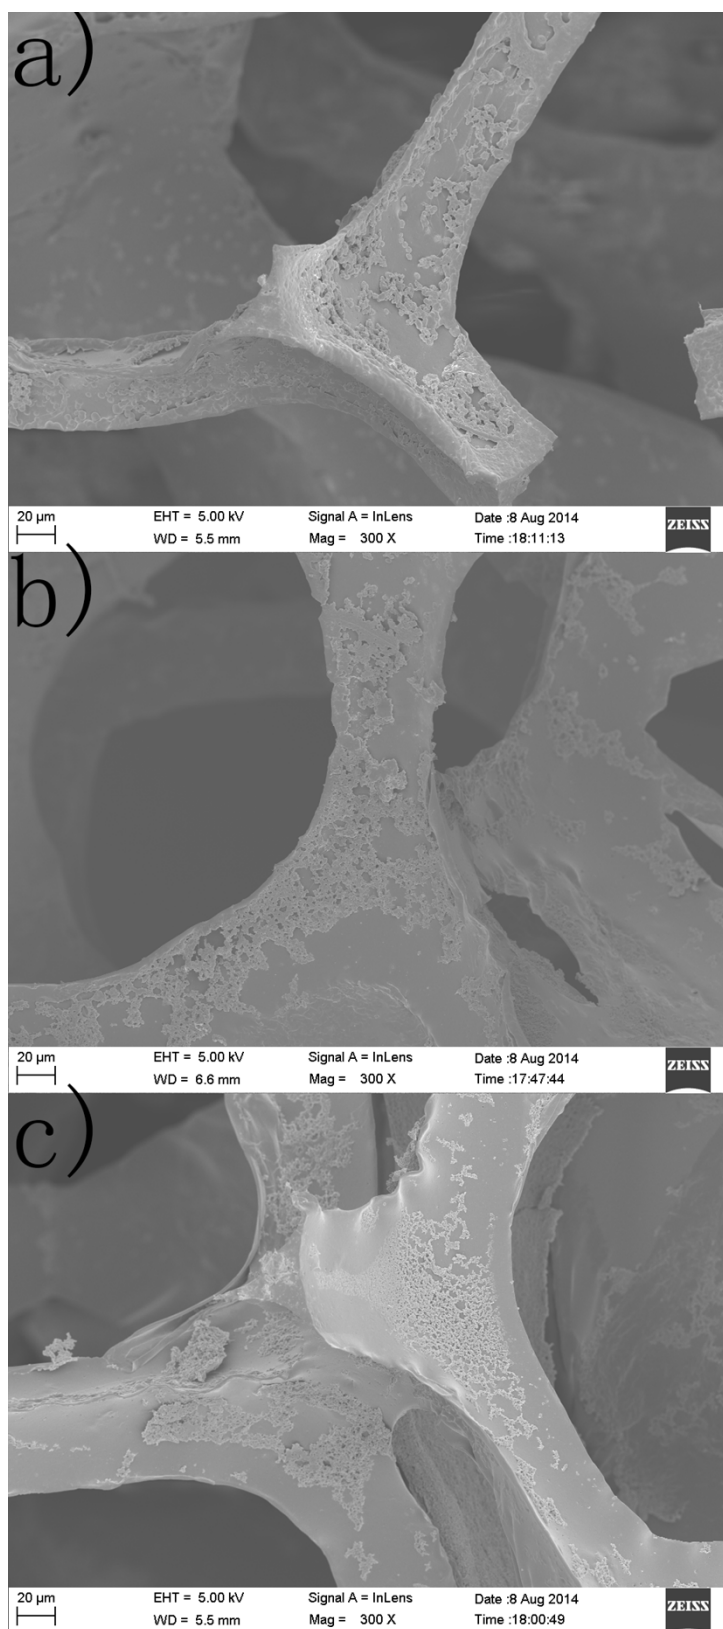

**S 6:** a) SEM image of PU sponge before oil collection; b) SEM image of PU sponge after crude oil collection for 4 hours; c) SEM image of PU sponge after collection of toluene for 4 hours.

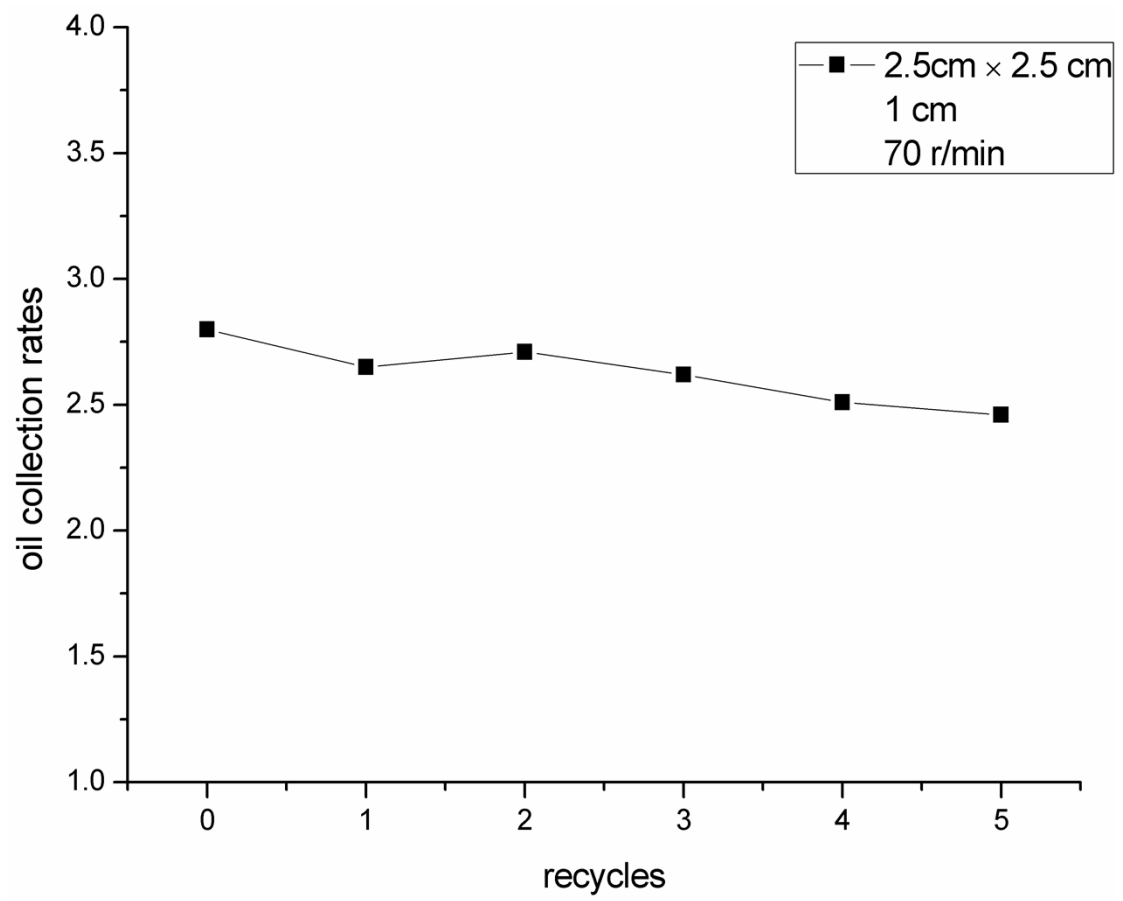

*S* 7: Oil collection rates for different recycles.
